# Supplementary material for: Enhancing mitochondrial pyruvate metabolism ameliorates ischemic reperfusion injury in the heart
Source: PubMed Central journal article supplement (PMC11385101; doi:10.1172/jci.insight.180906), 2024-07-25
Supplement: jciinsight-9-180906-s110.pdf [file jciinsight-9-180906-s110.pdf]

SUPPLEMENTAL MATERIALS

**A**

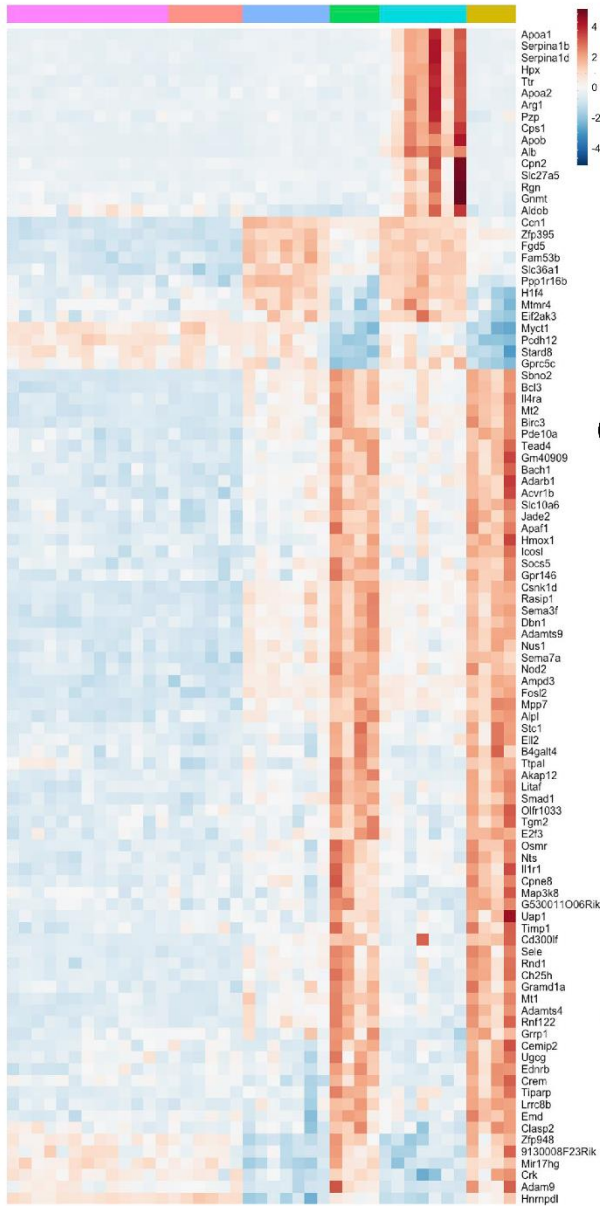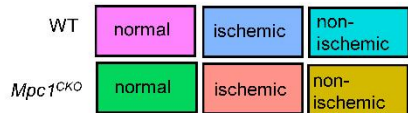

**B**

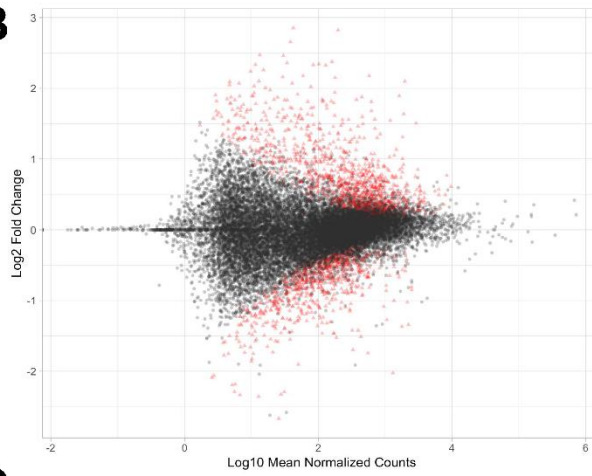

**C**

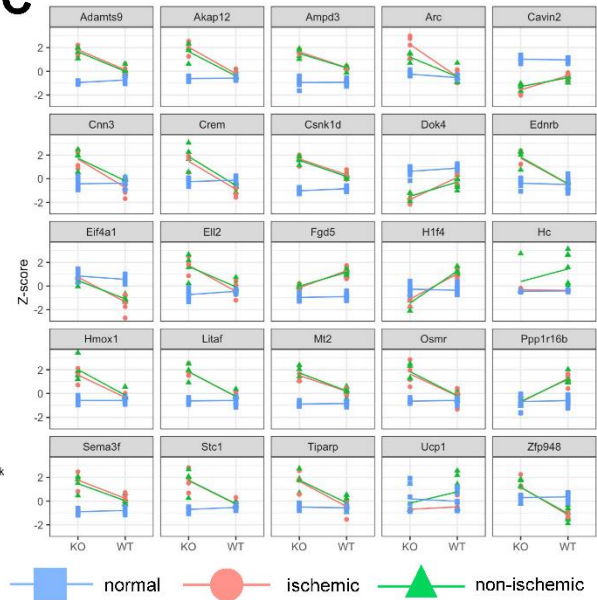

**Supplemental Figure 1: A)** Differential gene expression heatmap in I/R injury showing the global gene expression profiles of the top 100 differentially expressed genes in myocardial tissue from WT and *Mpc1<sup>CKO</sup>* mice. Each row represents a gene, and each column corresponds to a tissue sample, categorized by genotype and myocardial tissue status: normal (WT: n=4, *Mpc1<sup>CKO</sup>*: n=4), ischemic (WT: n=5, *Mpc1<sup>CKO</sup>*: n=4), and non-ischemic (WT: n=5, *Mpc1<sup>CKO</sup>*: n=4). The color gradient, from blue to red, denotes the expression level from low to high (z-scores), showing gene expression patterns across different conditions and genotypes. The analysis was conducted using an adjusted p-value of less than 0.05 and a false discovery rate (FDR) of 5%. **B)** MA-plot showing the differential gene expression analysis between *Mpc1<sup>CKO</sup>* and WT ischemic myocardium. The x-axis displays the Log<sub>10</sub> mean normalized counts, which is the average expression of each gene across all samples, providing a measure of gene abundance. The y-axis shows the Log<sub>2</sub> fold change, representing the change in gene expression between the two conditions. Points in red indicate the top 200 significant genes with differential expression, clustered and scaled by rows. **C)** Interaction plots in Ischemic, Non-Ischemic, and Normal Conditions across genotypes (WT or *Mpc1<sup>CKO</sup>*) showing the scaled relative log expression (rlog) values, represented as z-scores, for the top 25 statistically significant (p<0.05) genes comparing ischemic, non-ischemic, and normal conditions across WT and *Mpc1<sup>CKO</sup>* mice.

A

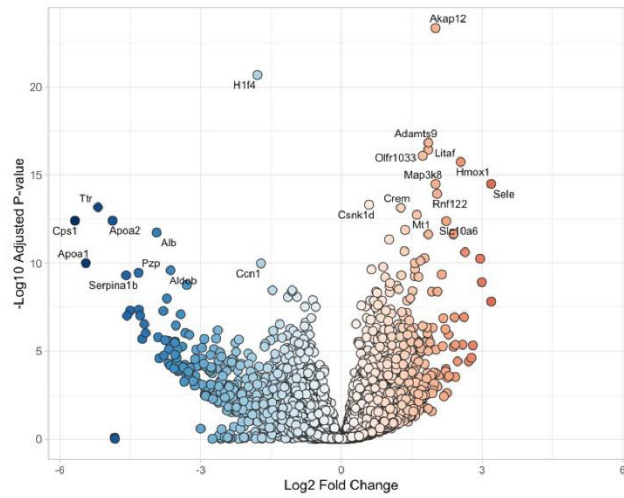

*Mpc1<sup>CKO</sup>* vs. WT (Non-ischemic)

B

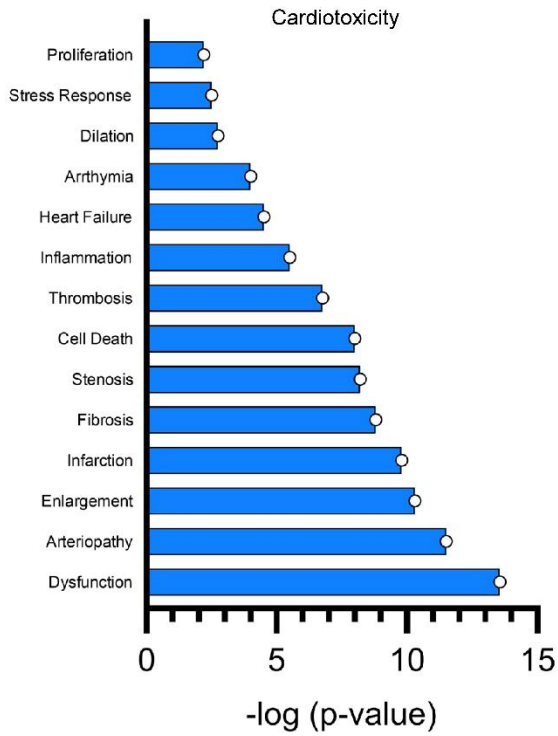

C

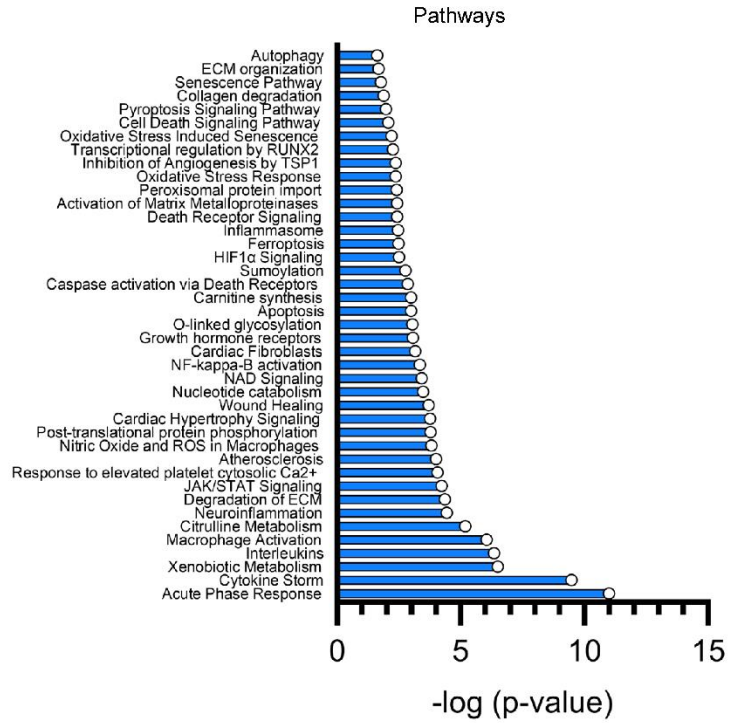

**Supplemental Figure 2: A.)** Volcano plot showing differential expression of genes in non-ischemic heart tissue derived from WT (n=5) and *Mpc1<sup>CKO</sup>* (n=4) heart tissue following I/R injury. Each dot corresponds to a specific gene. The x-axis shows the log<sub>2</sub> fold change in gene expression, indicating the magnitude of upregulation (to the right: red) or downregulation (to the left: blue). The y-axis shows the negative logarithm (base 10) of the adjusted p-value, which represents the statistical significance of the gene expression change. The upregulated genes in the *Mpc1<sup>CKO</sup>* non-ischemic tissue include markers such as Akap12, Adamts9, Hmox1, and Sele. Downregulated genes in the *Mpc1<sup>CKO</sup>* non-ischemic tissue include Cps1, Apoc1, and Serpinab1b. Ingenuity Pathway Analysis showing the cardiotoxicity report **(B)** and the pathways indicated **(C)** from the differentially expressed genes in non-ischemic heart tissue derived from WT and *Mpc1<sup>CKO</sup>* heart tissue following I/R injury.

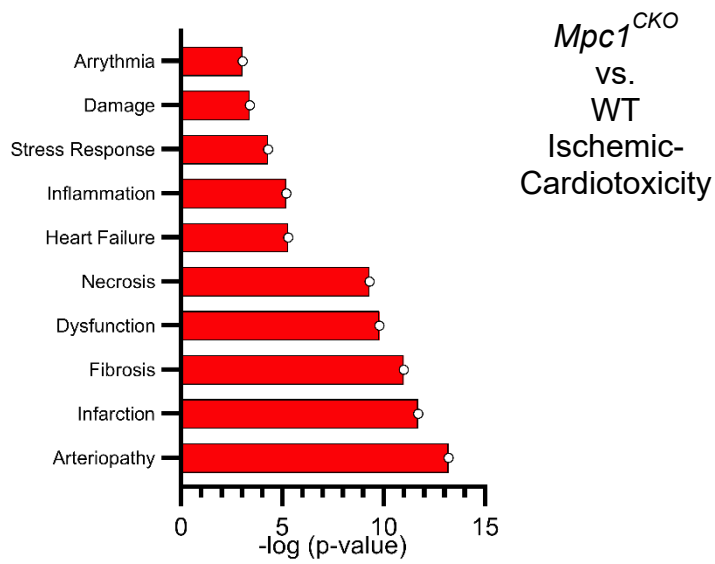

**Supplemental Figure 3:** Cardiotoxicity report from IPA analysis showing that the *Mpc1*<sup>CKO</sup> genes that were identified in the ischemic myocardium are associated with pathological conditions such as arteriopathy, infarction, and fibrosis (WT: n=5, *Mpc1*<sup>CKO</sup>: n=4).

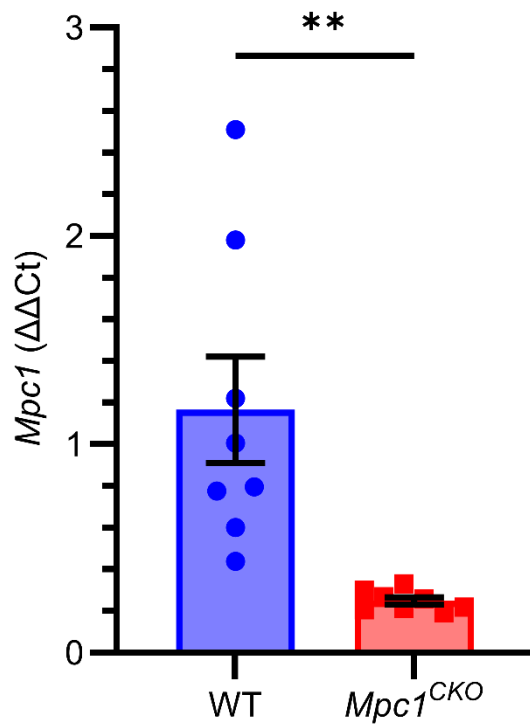

**Supplemental Figure 4:** Quantitative real-time PCR (qRT-PCR) assay for the determination of *Mpc1* gene expression levels. Expression levels are shown for WT (n=8) and MPC1<sup>CKO</sup> (n=8) mouse hearts. Unpaired t-test was used for statistical analysis. Error bars denote SEM. \*\*, p-value < 0.01, indicating a significant reduction in *Mpc1* expression in the *Mpc1*<sup>CKO</sup> samples compared to WT controls.

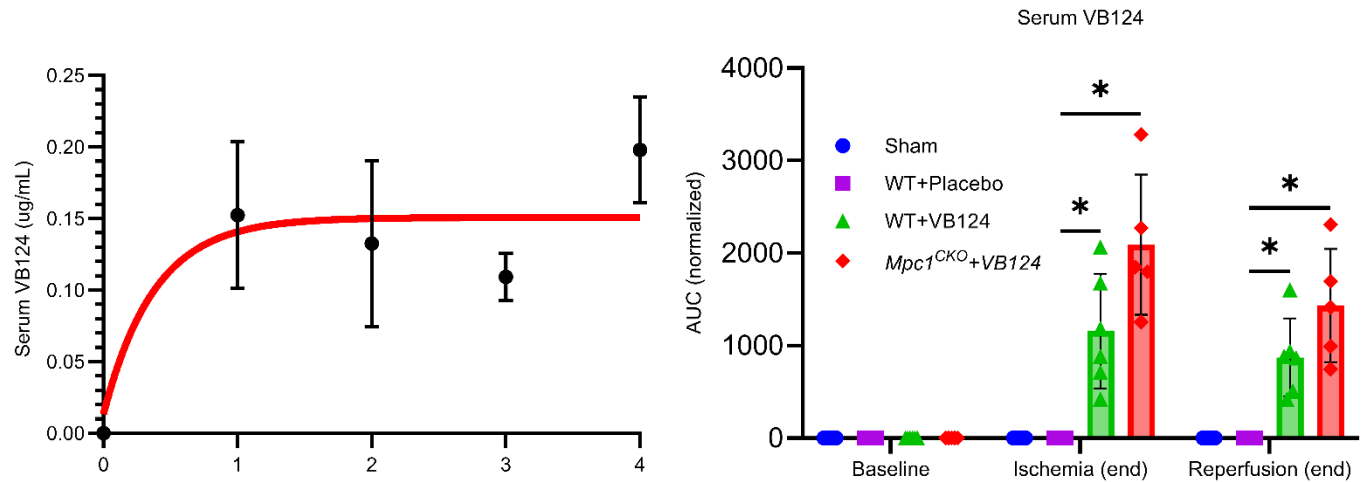

**Supplemental Figure 5:** Serum pharmacokinetics of VB124 post-gavage. **Left)** Serum concentration-time profile of VB124 (30mg/kg) following oral administration (gavage) over a period of 4 hours. The x-axis represents the time post-administration in hours, and the y-axis is the serum concentration of VB124 in micrograms per milliliter ( $\mu\text{g/mL}$ ). Each point on the curve represents the mean serum concentration of VB124 at the corresponding time point, with error bars indicating SEM from four individual C57BL/6J mice ( $n=4$ ). The red curve is a “line of best-fit” that models VB124 absorption into the circulation over time. From this data, the 1-hour time-point was selected as our target for reperfusion. **Right)** LC-MS detection of VB124 in sham, placebo, C57BI/6 mice dosed with VB124, and  $Mpc1^{CKO}$  mice dosed with VB124. 2-way ANOVAs with a Tukeys HSD posthoc test were used for statistical analysis.
